# Supplementary material
Source: PubMed Central journal article supplement (PMC5826160)
Supplement: AAC.01785-17_zac003186972s1.pdf [file AAC.01785-17_zac003186972s1.pdf]

## SUPPLEMENTAL DATA

**Table S1 : MICs determined by the EUCAST reference technique**

| Strain |                   | Mean MIC <sub>50</sub> (mg/L) |              |               |            |
|--------|-------------------|-------------------------------|--------------|---------------|------------|
|        |                   | Fluconazole                   | Posaconazole | Anidulafungin | Micafungin |
| DAY286 | Control strain    | 0.1875                        | 0.007875     | ≤0.0078125    | 0.03125    |
| DAY5   | <i>rim101</i> -/- | 0.125                         | 0.007875     | 0.01575       | 0.03125    |
| DAY23  | <i>rim20</i> -/-  | 0.125                         | 0.007875     | NA            | 0.03125    |
| DAY61  | <i>rim8</i> -/-   | 0.1875                        | 0.007875     | 0.01575       | 0.03125    |
| GKO88  | <i>rim13</i> -/-  | 0.125                         | 0.007875     | 0.01575       | 0.03125    |
| MC21   | <i>rim21</i> -/-  | 0.1875                        | 0.007875     | 0.01575       | 0.03125    |
| MC23   | <i>rim9</i> -/-   | 0.125                         | 0.01575      | 0.01575       | 0.03125    |

Tables S2, S3, S4 and S5: xlsx files

**Table S6: Primers and probes used for RT-qPCR**

| Gene          | Primers and probes                                                                                                     | Reference  |
|---------------|------------------------------------------------------------------------------------------------------------------------|------------|
| <i>ACT1</i>   | F-ACT1 : TTGGTGATGAAGCCCAATCC<br>R-ACT1 : CATATCGTCCCAGTTGGAAACA<br>S-ACT1 : FAM-TTGACCTTGAGATACCCAATTGAACACGGTA-Tamra | (1)        |
| <i>HSP90</i>  | F-HSP90 : GCTGACGTTTCTATGATTG<br>R-HSP90 : CATCCAAAGTAACAGTGAAC<br>S-HSP90 : FAM-TCTACTCCTTGTTCTTGGTTGCTGAT-Tamra      | This study |
| <i>IPT1</i>   | F-IPT1 : TGGAGAGAATGCTAATGC<br>R-IPT1 : CCATCTTGAATAATATCCAACA<br>S-IPT1 : FAM-ATTATGATACTCCAGTTATGCCGCT-Tamra         | This study |
| <i>RIM101</i> | F-RIM101 : CCCAATCACCTCACATTA<br>R-RIM101 : GCATCAGTGATAGGAGAA<br>S-RIM101 : FAM-CCATTCCTCATTCACTTCTCAATCTGC-Tamra     | This study |

## SUPPLEMENTAL FIGURES

**A**

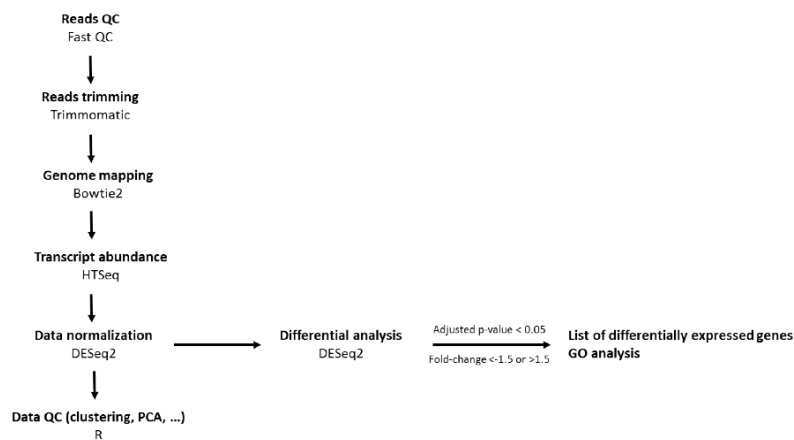

**B**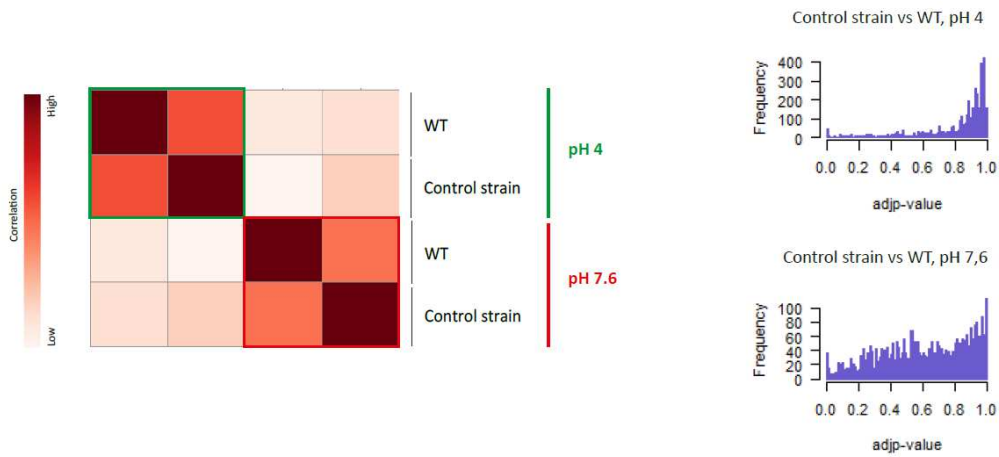**C**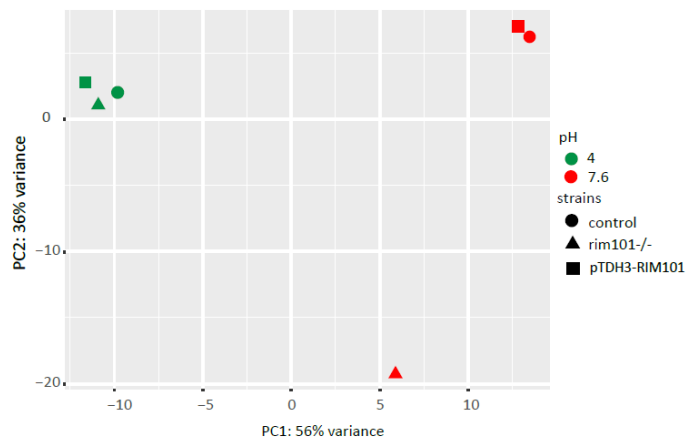**Figure S1: Transcriptomic analysis**

**(A)** Schematic representation of the bioinformatic pipeline used for RNA-SEQ data analysis, **(B)** Left panel: unsupervised hierarchical clustering of the distance between SC5314 (WT) and DAY185 (control strain) samples at acidic and alkaline pH. All replicates are collapsed. Right panel: results of the differential analysis of DAY185 versus SC5314 transcriptomic programs at pH 4 and 7.6 expressed based on the adjusted p-value. No statistically significant difference was evidenced between these two strains. **(C)** Principal Component Analysis applied on the normalized counts of each sample. Replicates are collapsed. Principal components are represented on the x- and y-axis. Data obtained at acidic pH are shown in green; data obtained at alkaline pH are shown in red, strains are identified by the following shapes: wild-type (SC5314), round; *rim101Δ*-disrupted strain (DAY 25), triangle; *RIM101*-overexpressed strain (CGY1), square.

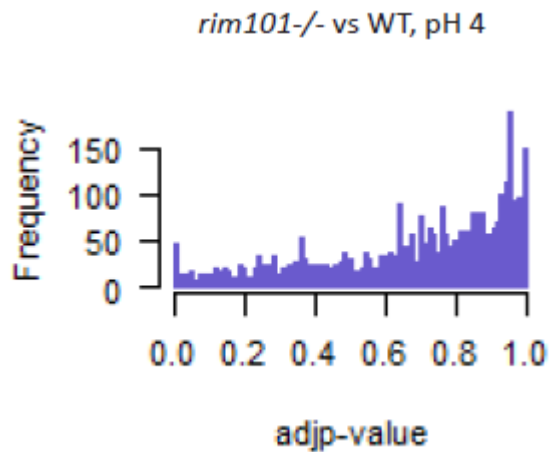

**Figure S2: Results of the differential analysis of the *rim101Δ*-disrupted strain (DAY25) versus the SC5314 reference strain transcriptomic programs at pH 4 expressed based on the adjusted p-value**

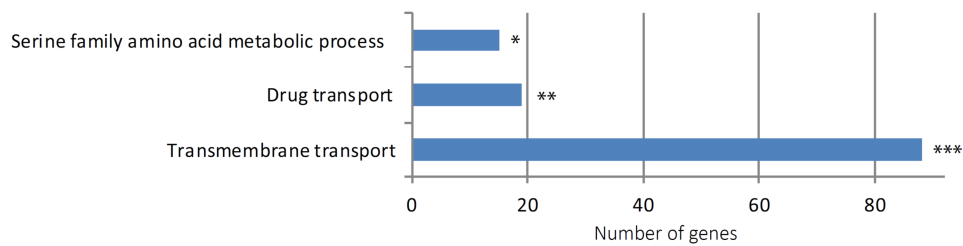

**Figure S3: GO-term enrichment analysis at acidic pH**

GO-term enrichment analysis of biological processes among genes differentially expressed at acidic pH between the RMI101-overexpressed strain (CGY1) and the SC5314 reference strain. The number of genes is expressed on the x-axis. The symbols \*, \*\* and \*\*\* respectively indicate p-values < 0.05, p-values < 0.01 and p-values < 0.001.

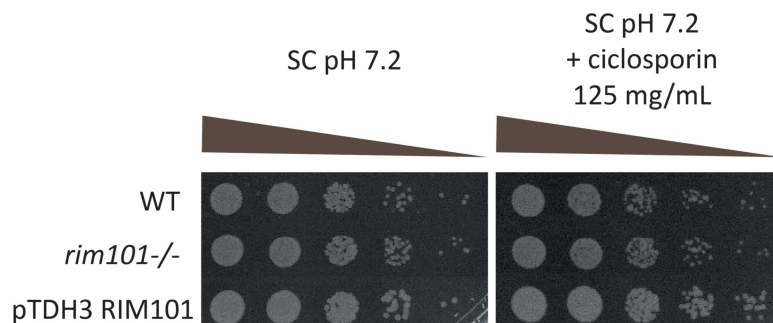

**Figure S4: Pharmacological inhibition of calcineurin**

Colony forming assays in presence of cyclosporin A, a pharmacological inhibitor of calcineurin. Cells were plated in ten-fold dilutions in presence of cyclosporin A (125 mg/mL) in SC-medium buffered at pH 7.2. No specific phenotype was observed.

## A. RIM101

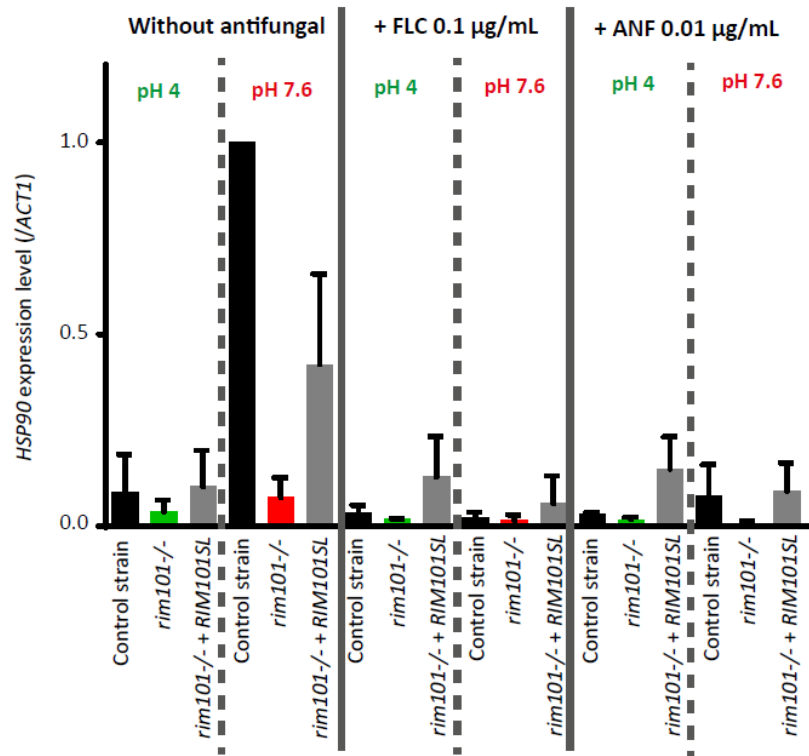

## B. IPT1

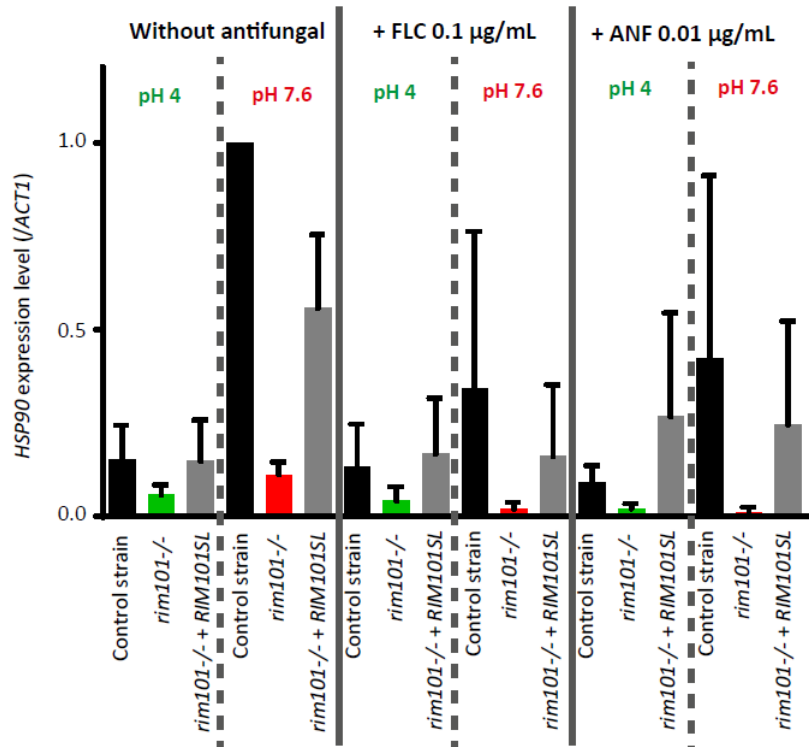

## C. HSP90

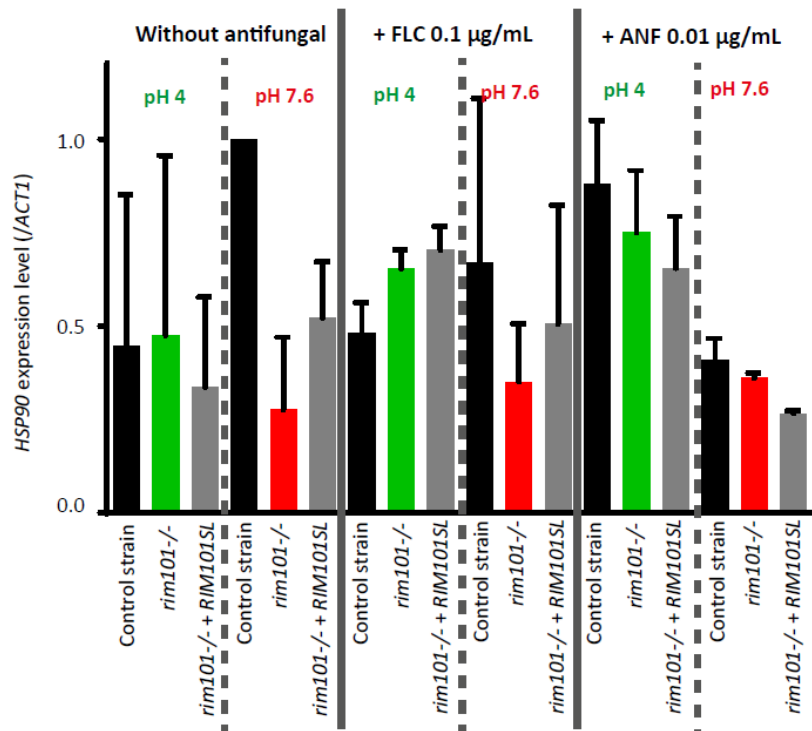

**Figure S5: *RIM101*, *IPT1* and *HSP90* expression levels normalized to *ACT1* obtained in RT-qPCR at acidic and alkaline pH, under drug-stress conditions or not, in the DAY25 *rim101Δ*-disrupted strain, the DAY5SL complemented strain and the DAY185 control strain.**

Each strain (DAY185, DAY25 and DAY5SL (Table 1)) was pre-cultured overnight in liquid YPD medium at 30°C under agitation, then diluted to an OD600 of 0.1 in SC medium buffered at pH 7.6 or pH 4 respectively with HEPES or citrate buffer, in presence or absence of fluconazole (0.1 µg/mL) or anidulafungin (0.001 µg/mL). Cells were then incubated at 30°C (to be consistent with the other experiments of the study and avoid intense yeast-to-hyphae transition), under agitation until an OD600 of 0.6-0.8 was reached, and collected by centrifugation. RNA extraction was performed on the pellet using the MasterPure™ Yeast RNA Purification Kit (Epicentre), according to manufacturer's instructions. Two biological replicates were performed for each strain and condition.

RT-QPCR was performed using the KAPA Probe Fast qPCR Master Mix (Clinisciences). Primers and probes are listed in Table S6. Gene expression levels were normalized to the *ACT1* ones.

## REFERENCES

1. Morio F, Pagniez F, Lacroix C, Miegerville M, Le Pape P. 2012. Amino acid substitutions in the *Candida albicans* sterol  $\Delta 5,6$ -desaturase (Erg3p) confer azole resistance: characterization of two novel mutants with impaired virulence. *J Antimicrob Chemother* 67(9):2131–8.
